# Supplementary material for: SME’s bond issuance and access to bank credit: evidence from Italy
Source: Springer Nature journal article supplement (doi:10.1007/s11846-024-00760-2), 2024-04-10
Supplement: MOESM1 [file 26965358]

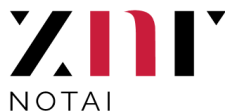

N. 67470 di Repertorio

N. 19124 di Raccolta

VERBALE DI RIUNIONE DI CONSIGLIO DI AMMINISTRAZIONE

REPUBBLICA ITALIANA

14 novembre 2022

Il giorno quattordici novembre duemilaventidue,

in Milano, Via Metastasio n. 5,

io sottoscritto STEFANO RAMPOLLA, notaio in Milano, iscritto presso il Collegio Notarile di Milano,

procedo alla redazione e sottoscrizione del verbale della riunione del Consiglio di Amministrazione della società:

**“FENIX ENTERTAINMENT SOCIETA’ PER AZIONI”**, o in forma abbreviata **FENIX ENTERTAINMENT S.p.A.**”

con sede legale in Roma, piazzale delle Belle Arti n. 6, capitale sociale Euro 174.269,36 sottoscritto e versato, iscritta al Registro delle Imprese tenuto presso la Camera di Commercio di Roma al numero di iscrizione e codice fiscale 14002131002, Repertorio Economico Amministrativo n. RM-1489846, iscritta nella sezione speciale in qualità di PMI Innovativa, le cui azioni sono ammesse alle negoziazioni presso il sistema di negoziazione multilaterale Euronext Growth Milan organizzato e gestito da Borsa Italiana S.p.A.,

tenutasi, mediante mezzi di telecomunicazione, in data 11 novembre 2022 in Milano, via Metastasio n. 5, presso lo studio ZNR Notai.

Il presente verbale viene pertanto redatto, su richiesta della società predetta, e per essa del Presidente del Consiglio di Amministrazione SILVESTRO SILVESTRI, nei tempi consentiti.

Il Consiglio si è svolto alla mia costante presenza, come infra risulta.

"Il giorno undici del mese di novembre dell'anno duemilaventidue, alle ore 11 e 16 minuti, si è riunito in Milano, via Metastasio n. 5, presso lo studio ZNR Notai - mediante mezzi di telecomunicazione – il Consiglio di Amministrazione della società

**“FENIX ENTERTAINMENT SOCIETA’ PER AZIONI”**, o in forma abbreviata **“FENIX ENTERTAINMENT S.p.A.”**

con sede legale in Roma, piazzale delle Belle Arti n. 6, capitale sociale Euro 174.269,36 sottoscritto e versato, iscritta al Registro delle Imprese tenuto presso la Camera di Commercio di Roma al numero di iscrizione e codice fiscale 14002131002, Repertorio Economico Amministrativo n. RM-1489846, iscritta nella sezione speciale in qualità di PMI Innovativa, le cui azioni sono ammesse alle negoziazioni presso il sistema di negoziazione multilaterale Euronext Growth Milan organizzato e gestito da Borsa Italiana S.p.A.,

la **"Società"**, o **“FENIX ENTERTAINMENT”**).

Il signor SILVESTRO SILVESTRI, Presidente del Consiglio di Amministrazione della Società, collegato con mezzi di telecomunicazione, assume la presidenza del Consiglio di Amministrazione, ai sensi di legge, e

designa nella persona del notaio STEFANO RAMPOLLA il segretario della riunione, incaricandolo di redigere il relativo verbale per la parte da verbalizzarsi per pubblico atto notarile.

Il notaio dichiara di essere fisicamente presente in Milano, via Metastasio n. 5, presso lo studio ZNR Notai.

Il Presidente constata e dà atto:

- che la presente riunione è stata indetta per oggi, ad ore 11 e 15, in via Metastasio n. 5, presso lo studio ZNR Notai, con avviso di convocazione spedito con le modalità e nei termini di cui all'articolo 23.2 dello statuto sociale;

- che per il Consiglio di Amministrazione, oltre al Presidente, sono intervenuti mediante mezzi di telecomunicazione i consiglieri Riccardo Di Pasquale, Andrea Di Nardo, Maurizio Baldassarini e Stefano Cervone;

- che, per il Collegio Sindacale, sono intervenuti mediante mezzi di telecomunicazione, il Presidente Francesco Molinari ed il sindaco effettivo Anna Flavia D'Alfonso mentre è giustificata l'assenza del sindaco effettivo Alberto Frau;

- che detti collegamenti mediante mezzi di telecomunicazione concretano idonea modalità di intervento ai sensi dell'articolo 23.4 del vigente statuto sociale, derogata la previsione sub (a) che il Presidente ed il Segretario siano presenti nello stesso luogo, in forza dei principi di interpretazione stabiliti dalla massima n. 187 della Commissione Società del Consiglio notarile di Milano.

Il Presidente dichiara, pertanto, la valida costituzione del Consiglio, ai sensi dell'articolo 24.1 dello statuto sociale per discutere e deliberare sul seguente

#### ORDINE DEL GIORNO

1. Proposta di emissione di un prestito obbligazionario non convertibile per un importo massimo di Euro 3.000.000,00. Deliberazioni annesse e conseguenti.

Aperta la seduta,

il Presidente espone agli intervenuti che è necessario assicurare alla Società una congrua provvista di mezzi finanziari, in un equilibrato rapporto tra mezzi propri ed indebitamento ed evidenzia l'opportunità di emettere un prestito obbligazionario non convertibile nell'ambito della più ampia operazione denominata "Basket Bond Euronext Growth Milan" (l'"**Operazione**").

Tale Operazione consiste nella emissione di prestiti obbligazionari (i "Bond"), da offrire in sottoscrizione a Growth Market Basket Bond S.r.l., special purpose vehicle costituito ai sensi della legge n. 130 del 30 aprile 1999 (il "Sottoscrittore" o "SPV") secondo una logica di portafoglio (su base basket). In particolare, è previsto che tali emissioni di Bond:

(i) siano costituite in portafoglio (basket bond);

(ii) siano sottoscritte dalla SPV, che si finanzia mediante l'emissione di titoli asset backed (le "**Note**") tutti sottoscritti da Banca Finnat Euramerica S.p.A., Cassa Depositi e Prestiti S.p.A. e Banca del Mezzogiorno - Mediocredito Centrale S.p.A., tutti investitori qualificati, soggetti a vigilanza prudenziale.

Circa le modalità operative dell'operazione il Presidente informa gli intervenuti che è stato individuato, quale coordinatore finanziario della stessa, Banca Finnat Euramerica S.p.A. (l'"**Arranger**"), con il quale la

Società ha già sottoscritto il cosiddetto mandato di arranging avente ad oggetto i servizi di assistenza a favore della stessa da parte dell'Arranger in relazione alla strutturazione dell'Operazione come meglio ivi previsti (il "**Mandato di Arranging**").

Illustrata l'Operazione in questi tratti generali, il Presidente si sofferma sull'emittendo prestito obbligazionario della Società ricordando che l'articolo 2410 del Codice Civile attribuisce agli amministratori tale competenza in caso di mancata diversa disposizione dello statuto sociale, e dà atto che lo statuto sociale della Società non deroga al regime del predetto articolo 2410 del Codice Civile, e che, pertanto, il Consiglio è legittimato a deliberare l'emissione.

Il Presidente passa quindi ad illustrare le caratteristiche, le fasi e le modalità dell'emissione del prestito obbligazionario, chiarendo che:

- \* il prestito obbligazionario, dell'ammontare complessivo di euro 3.000.000,00, sarà rappresentato da obbligazioni non convertibili e non subordinate;
- \* le obbligazioni saranno integralmente offerte in sottoscrizione e sottoscritte dalla SPV;
- \* le obbligazioni non saranno destinate a quotazioni su mercati regolamentati e/o sistemi multilaterali di negoziazione;
- \* le obbligazioni saranno emesse in unica tranche;
- \* il prezzo di emissione sarà pari al 100% (cento per cento) del valore nominale dell'obbligazione;
- \* le obbligazioni saranno emesse in forma dematerializzata e accentrate presso Monte Titoli S.p.A.;
- \* il taglio minimo di ciascuna obbligazione sarà pari ad Euro 100.000,00 (centomila/00);
- \* il prestito avrà una durata pari a sei anni, decorrenti dalla data di emissione;
- \* il prestito obbligazionario sarà fruttifero di interessi che matureranno applicando un tasso fisso nominale annuo lordo determinato come segue: uno *spread* pari a 3,10% maggiorato del tasso *mid swap* a quattro anni rilevato sul circuito fonte *Bloomberg EUSA4 CMPN CurrencyGo* due giorni lavorativi prima della data di stipula del Contratto di Sottoscrizione (come *infra* definito);
- \* il pagamento degli interessi sarà liquidato in valuta Euro, semestralmente, in via posticipata;
- \* il rimborso del prestito avverrà alla pari su base *amortising*, con un periodo di pre-ammortamento di 12 mesi;
- \* le obbligazioni saranno emesse in esenzione dall'obbligo di pubblicazione di un prospetto di offerta ai sensi dell'articolo 1, paragrafo 4, del Regolamento (UE) 2017/1129, come successivamente modificato e integrato;
- \* in caso di successiva circolazione le obbligazioni potranno essere trasferite esclusivamente a investitori qualificati, come definiti all'articolo 2 del Regolamento (UE) 2017/1129, all'articolo 100 del D. Lgs. n. 58/1998 e all'articolo 35, comma 1, lettera (d), del Regolamento CONSOB n. 20307/2018, come successivamente modificati e integrati;
- \* le obbligazioni saranno assoggettate al regime fiscale di cui al D. Lgs. n. 239 del 1° aprile 1996 (s.m.i.);

\* le obbligazioni saranno disciplinate unicamente dalla legge italiana e soggette in via esclusiva alla giurisdizione italiana e il Foro competente in via esclusiva sarà quello di Roma.

Si da atto che nel corso dell'esposizione, alle 11 e 35 circa, si è collegato mediante mezzi di telecomunicazioni il consigliere Maurizio Paternò di Montecupo.

A questo punto il Presidente dichiara che una bozza del regolamento che disciplinerà il prestito obbligazionario (il "Regolamento"), è in fase avanzata di elaborazione. Al riguardo il Presidente illustra in particolare che il Regolamento definitivo includerà specifici *financial covenants*, impegni informativi, impegni di fare e non fare e dichiarazioni e garanzie, e altre usuali clausole, anche eventualmente relative a rimborso anticipato, non dissimili da quelli comuni nella prassi, e precisa altresì che per dar corso all'emissione delle obbligazioni la Società sarà tenuta a stipulare, fra gli altri: (i) un contratto di sottoscrizione delle obbligazioni con il Sottoscrittore e l'Arranger (il "**Contratto di Sottoscrizione**"); (ii) un contratto con Banca Finnat Euramerica S.p.A., in veste di agente di pagamento incaricato di effettuare i pagamenti e i calcoli in favore degli obbligazionisti; (iii) un contratto di conto corrente (c.d. conto *paying agent*) e documenti ancillari con Banca Finnat Euramerica S.p.A. per l'apertura del conto per il pagamento dedicato alle obbligazioni emesse e per il ruolo di Banca Agente; e (iv) una serie di ulteriori contratti, atti e documenti per la prestazione di attività ancillari all'emissione delle obbligazioni o comunque finalizzati al buon esito dell'Operazione.

Il Presidente evidenzia poi che l'emissione del prestito obbligazionario è prevista indicativamente entro il 31 dicembre 2022.

Quindi i Sindaci intervenuti, dato atto e confermato unitamente al Presidente:

- che non sono in corso prestiti obbligazionari;
- che la Società non ha prestato garanzie per obbligazioni emesse da altre società, neppure estere;
- che la Società non garantisce il rimborso degli altri emittenti partecipanti all'operazione "basket bond";
- che dalla data dell'ultimo bilancio approvato ad oggi non sono intervenuti fatti di rilievo tali da impedire l'attestazione di cui infra;

ATTESTANO,

a nome dell'intero Collegio Sindacale, con riferimento all'emissione all'ordine del giorno, il rispetto del limite di cui all'articolo 2412, comma 1 del codice civile.

Concluso l'intervento dei componenti del Collegio Sindacale, prende la parola il consigliere Andrea Di Nardo ed anticipa la propria astensione rispetto alla votazione su quanto all'ordine del giorno; dichiara di essere in conflitto di interesse rispetto ai contenuti dell'assumenda delibera dal momento che, comunica, egli è creditore della Società.

A questo punto il Presidente chiede al notaio di dare lettura della proposta di deliberazione.

A ciò aderendo il notaio dà lettura come segue:

*"Il Consiglio di Amministrazione,*

*- preso atto di quanto dichiarato dal Presidente e delle attestazioni dei Sindaci intervenuti,*

- dato atto che in materia di emissione di obbligazioni lo statuto non dispone diversamente da quanto dalla legge previsto,

**DELIBERA**

1) di emettere un prestito obbligazionario dell'importo complessivo di Euro 3.000.000,00, prestito che avrà i termini e le condizioni di seguito indicati:

(a) le obbligazioni saranno non convertibili e non subordinate;

(b) le obbligazioni saranno integralmente offerte in sottoscrizione e sottoscritte dalla SPV;

(c) le obbligazioni non saranno destinate a quotazioni su mercati regolamentati e/o sistemi multilaterali di negoziazione;

(d) le obbligazioni saranno emesse in unica tranche;

(e) le obbligazioni saranno emesse in forma dematerializzata e accentrate presso Monte Titoli S.p.A.;

(f) ciascuna obbligazione sarà del taglio unitario di euro 100.000,00 (centomila/00);

(g) il prezzo di emissione sarà pari al 100% (cento per cento) del valore nominale dell'obbligazione;

(h) il prestito avrà una durata pari a sei anni, decorrenti dalla data di emissione;

(i) il prestito obbligazionario sarà fruttifero di interessi che matureranno applicando un tasso fisso nominale annuo lordo determinato come segue: uno spread pari al 3,10% maggiorato del tasso mid swap a quattro anni rilevato sul circuito fonte Bloomberg EUSA4 CMPN CurrencyGo due giorni lavorativi prima della data di stipula del Contratto di Sottoscrizione;

(j) gli interessi saranno corrisposti in valuta Euro, su base semestrale, in via posticipata;

(k) il rimborso del prestito alla pari e, dunque, al 100% (cento per cento) del valore nominale, avverrà secondo il piano di ammortamento che sarà incluso nel Regolamento;

(l) il profilo di rimborso sarà su base amortising, con un periodo di pre-ammortamento di 12 mesi;

(m) le obbligazioni saranno assoggettate al regime fiscale di cui al D. Lgs. n. 239 del 1° aprile 1996 (s.m.i.);

(n) le obbligazioni saranno emesse in esenzione dall'obbligo di pubblicazione di un prospetto di offerta ai sensi dell'articolo 1, paragrafo 4, del Regolamento (UE) 2017/1129, come successivamente modificato e integrato;

(o) in caso di successiva circolazione le obbligazioni potranno essere trasferite esclusivamente a investitori qualificati, come definiti all'articolo 2 del Regolamento (UE) 2017/1129, all'articolo 100 del D. Lgs. n. 58/1998 e all'articolo 35, comma 1, lettera (d), del Regolamento CONSOB n. 20307/2018, come successivamente modificati e integrati;

(p) le obbligazioni saranno disciplinate unicamente dal Regolamento, secondo quanto previsto nella bozza come sopra menzionata, dalla legge italiana e saranno soggette in via esclusiva alla giurisdizione italiana, con foro competente in via esclusiva quello di Roma.

2) di autorizzare la dematerializzazione e l'accentramento delle obbligazioni presso il sistema di gestione accentrata di Monte Titoli S.p.A.;

3) di conferire al Presidente Silvestro SILVESTRI e all'Amministratore Delegato Riccardo DI PASQUALE, in via disgiunta tra loro e con facoltà di

*sub-delega nei limiti di legge, ogni più ampio potere affinché procedano, con le modalità i termini e le condizioni ritenute del caso, alla concreta emissione delle obbligazioni non convertibili in favore della SPV, sottoscrivendo tutti gli eventuali contratti necessari con società terze, anche se non specificate nella esposizione del Presidente e, quindi, non indicate nel verbale della presente riunione;*

*4) di conferire al Presidente Silvestro SILVESTRI e all'Amministratore Delegato Riccardo DI PASQUALE, in via disgiunta tra loro e con facoltà di sub-delega nei limiti di legge, ogni più ampio potere necessario per porre in essere tutte le attività funzionali al perfezionamento della emissione delle obbligazioni e in generale dell'Operazione, con ogni e più ampia facoltà al riguardo, comprese quelle di:*

*(a) determinare la data effettiva di emissione delle obbligazioni (data di godimento) nonché di fissare, sulla base delle delibere assunte in data odierna, ogni elemento che non sia stato in questa sede definito, e di compiere quant'altro necessario per dare esecuzione alla presente delibera;*

*(b) definire il Regolamento in piena osservanza delle delibere assunte, apportando alla bozza menzionata dal Presidente, le modifiche e le integrazioni necessarie e/o opportune anche in funzione delle ulteriori negoziazioni con il primo sottoscrittore, sempre nel rispetto di quanto sopra deliberato;*

*(c) stipulare ogni negozio o accordo connesso o funzionale, ivi incluso, tra l'altro, il Contratto di Sottoscrizione (cui sarà allegato il Regolamento), con facoltà di apportare allo stesso ogni modifica e integrazione che si rendesse necessaria e/o opportuna;*

*(d) negoziare, concludere e sottoscrivere ogni contratto, atto o documento connesso alle o dipendente dalle obbligazioni e compiere quant'altro necessario e/o opportuno per il perfezionamento dell'emissione delle obbligazioni e in generale dell'Operazione, apportando a quanto deliberato tutte le modifiche, integrazioni o aggiunte che si rendessero necessarie e/o opportune ai fini della negoziazione, conclusione e perfezionamento dell'Operazione e/o dei contratti, atti o documenti ad essa connessi o dipendenti, ivi incluso l'espletamento delle formalità necessarie affinché quanto deliberato sia iscritto nel Registro delle Imprese, con facoltà di introdurre le eventuali variazioni, rettifiche o aggiunte che fossero allo scopo opportune e/o richieste dalle competenti autorità anche in sede di iscrizione nel Registro delle Imprese,*

*ratificando ogni azione posta in essere, sino alla data della presente riunione, nell'ambito, per il fine e, comunque, in connessione con l'Operazione, ivi espressamente inclusi i mandati eventualmente già conferiti."*

Al termine della lettura a cura del notaio, il Presidente dichiara aperta la discussione.

Nessuno intervenendo, il Presidente pone ai voti la proposta di delibera.

Al termine delle operazioni di voto, il Presidente dichiara che la proposta di delibera è approvata con manifestazione orale del voto, a maggioranza degli intervenuti – avendo tutti i consiglieri votato favorevolmente, fatta eccezione per il consigliere Andrea Di Nardo, astenutosi – e così con maggioranza idonea ai sensi dell'articolo 24.1 dello statuto sociale

Alle ore 11 e 45 minuti il Presidente dichiara che è esaurita la trattazione

degli argomenti da formalizzarsi per atto pubblico.”.

Il presente atto e i relativi adempimenti sono esenti da imposta di bollo ex artt. 26, comma 8, D.L. 179/2012, conv. in L. 221/2012 e 4, comma 9, D.L. 3/2015, conv. in L. 33/2015, trattandosi di società iscritta nella sezione speciale delle PMI Innovative da meno di cinque anni.

Il presente verbale viene da me notaio sottoscritto alle ore 14 e 55 di questo giorno quattordici novembre duemilaventidue.

Scritto con sistema elettronico da persona di mia fiducia e da me notaio completato a mano consta il presente atto di quattro fogli ed occupa sette pagine sin qui.

Firmato Stefano Rampolla

## REGISTRAZIONE

|            |                                                                                                                        |
|------------|------------------------------------------------------------------------------------------------------------------------|
| <b>[X]</b> | Atto nei termini di registrazione e di assolvimento dell'imposta di bollo ex art. 1-bis della Tariffa d.p.r. 642/1972. |
|------------|------------------------------------------------------------------------------------------------------------------------|

## IMPOSTA DI BOLLO

L'imposta di bollo per l'originale del presente atto e per la copia conforme ad uso registrazione, nonché per la copia conforme per l'esecuzione delle eventuali formalità ipotecarie, comprese le note di trascrizione e le domande di annotazione e voltura, viene assolta, *ove dovuta*, mediante Modello Unico informatico (M.U.I.) ai sensi dell'art. 1-bis, Tariffa d.p.r. 642/1972.

La presente copia viene rilasciata:

|            |                                                                                                                                                                              |
|------------|------------------------------------------------------------------------------------------------------------------------------------------------------------------------------|
| <b>[ ]</b> | <b><u>In bollo:</u></b> con assolvimento dell'imposta mediante Modello Unico Informatico (M.U.I.).                                                                           |
| <b>[ ]</b> | <b><u>In bollo:</u></b> con assolvimento dell'imposta in modo virtuale, in base ad Autorizzazione dell'Agenzia delle Entrate di Milano in data 9 febbraio 2007 n. 9836/2007. |
| <b>[ ]</b> | <b><u>In bollo:</u></b> per gli usi consentiti dalla legge.                                                                                                                  |
| <b>[X]</b> | <b><u>In carta libera:</u></b> per gli usi consentiti dalla legge ovvero in quanto esente ai sensi di legge.                                                                 |

## COPIA CONFORME

|            |                                                                                                                                                                                                                                                                                                                                                                        |
|------------|------------------------------------------------------------------------------------------------------------------------------------------------------------------------------------------------------------------------------------------------------------------------------------------------------------------------------------------------------------------------|
| <b>[X]</b> | <b><u>Copia su supporto informatico:</u></b> il testo di cui alle precedenti pagine è conforme all'originale cartaceo, munito delle prescritte sottoscrizioni, ai sensi dell'art. 22 d.lgs. 82/2005, da trasmettere con modalità telematica per gli usi previsti dalla legge.<br>Milano, data registrata dal sistema al momento dell'apposizione della firma digitale. |
| <b>[ ]</b> | <b><u>Copia cartacea:</u></b> la copia di cui alle precedenti pagine è conforme all'originale cartaceo, munito delle prescritte sottoscrizioni.<br>Milano, data apposta in calce                                                                                                                                                                                       |
